# Supplementary material for: TcO2 oxidative dissolution by birnessite under anaerobic conditions: a solid–solid redox reaction impacting the environmental mobility of Tc-99
Source: Royal Society of Chemistry journal article supplement (doi:10.1039/d1em00011j), 2021-01-01
Supplement: d1em00011j1.pdf [file d1em00011j1.pdf]

TcO<sub>2</sub> oxidative dissolution by birnessite under anaerobic conditions: a solid-solid redox reaction impacting the environmental mobility of Tc-99

Jordan Stanberry, Ilana Szlamkowicz, Lauren R. Purdy Vasileios Anagnostopoulos\*

Environmental Radiochemistry Group, Department of Chemistry, University of Central Florida, 4353 Scorpius Str, Orlando FL, 32816

\*corresponding author, [Vasileios.Anagnos@ucf.edu](mailto:Vasileios.Anagnos@ucf.edu)

### **Supplementary Information**

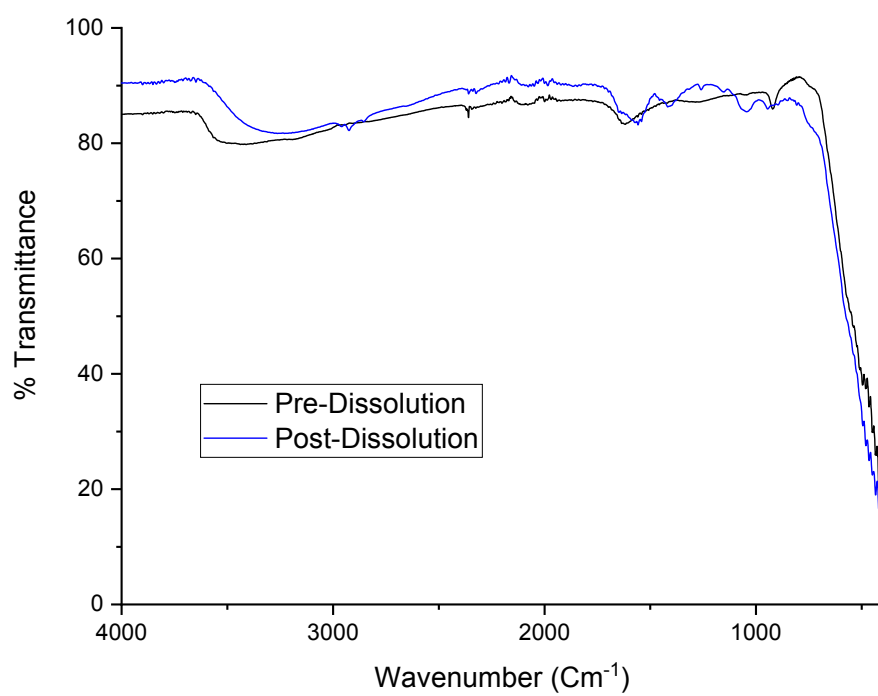

**Figure 1:** IR of Pre- and Post-Dissolution birnessite

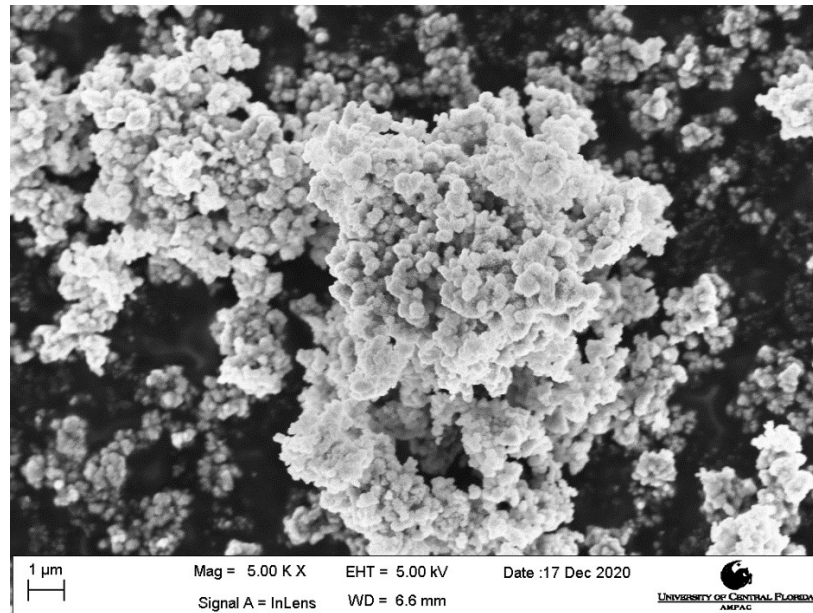

**Figure 2a:** SEM of pre-dissolution Birnessite (magnification = 5000x)

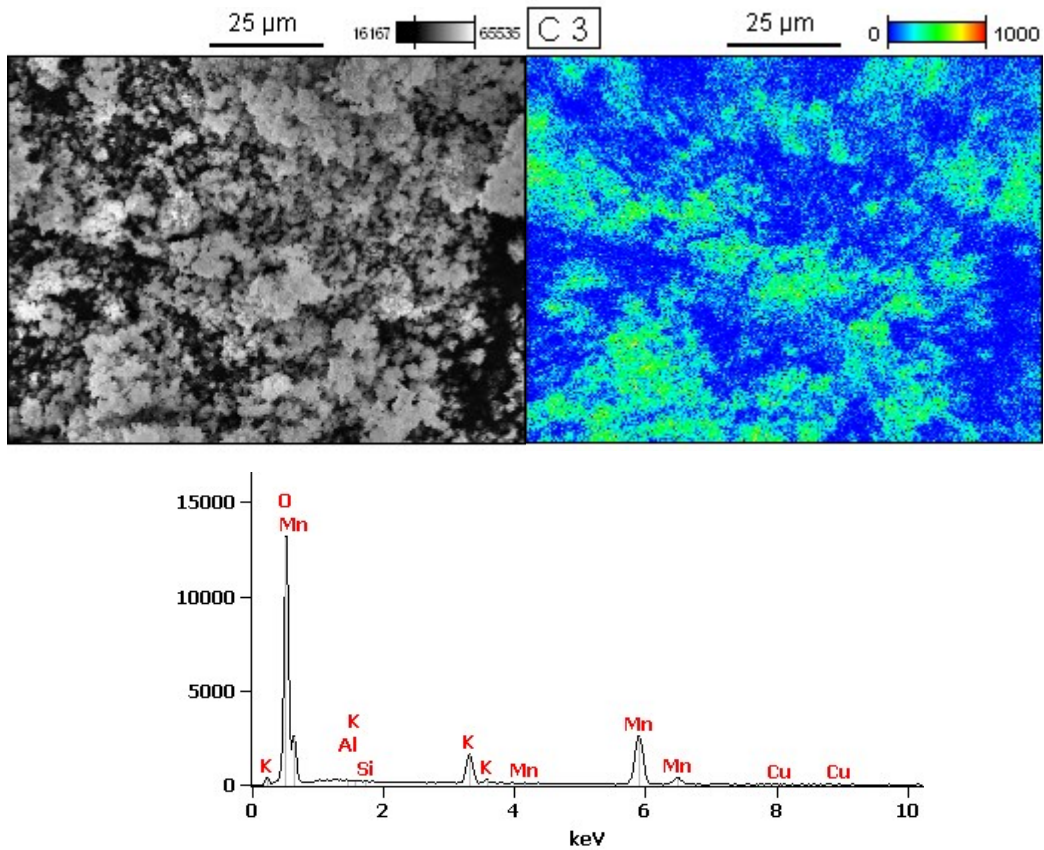

**Figure 2b:** SEM-EDS and Principal Component Mapping of pre-dissolution Birnessite (magnification = 1000x).

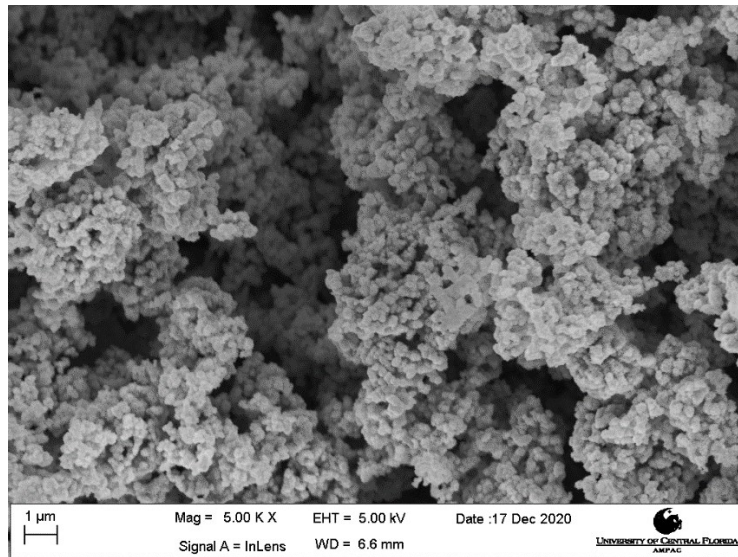

**Figure 3:** SEM of post-dissolution birnessite (magnification = 5000x)

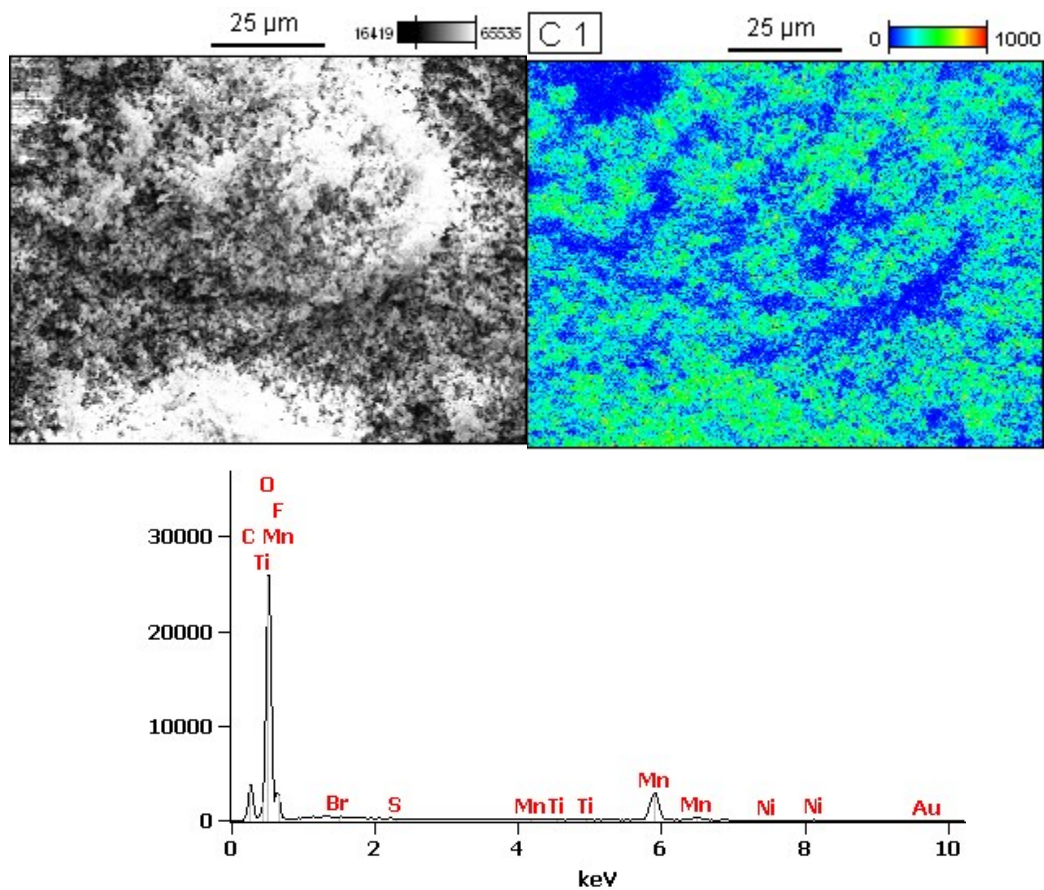

**Figure 4:** SEM-EDS and Principal Component Mapping of  $\text{MnCO}_3$ .

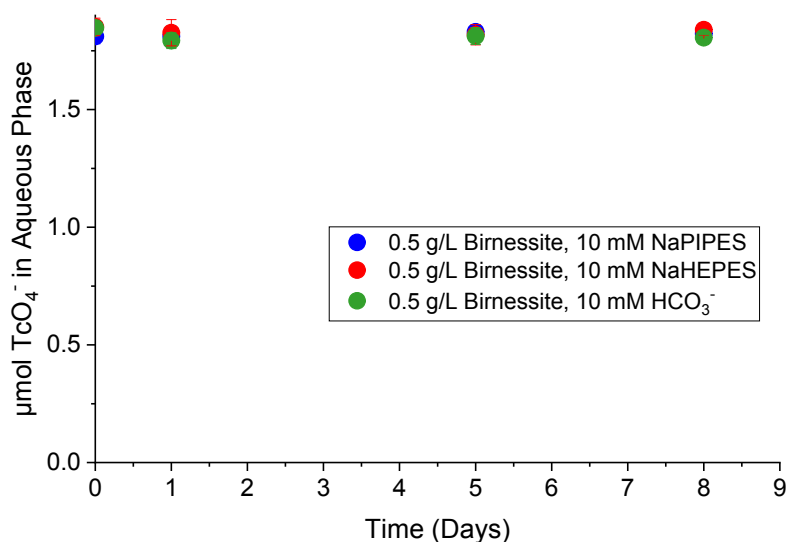

**Figure 5:** Sorption of  $\text{TcO}_4^-$  on birnessite. The blue set indicates samples buffered to pH 6.5 by 10 mM NaPIPES. The red set indicates samples buffered to pH 8.8 by 10 mM NaHEPES and the green set indicates samples buffered to pH 8.0 by 10 mM  $\text{HCO}_3^-$ . Error bars represent standard deviation of duplicate samples.

The sorption experiment depicted was performed in the anaerobic glovebox under the same conditions as the rest of the experiments. samples were spiked with  $1.81 \mu\text{mol TcO}_4^-$  (the molar equivalent of Tc-99 in  $0.25 \text{ mg TcO}_2$ ) and the concentration of  $\text{TcO}_4^-$  in the aqueous phase was monitored over time. The  $\text{TcO}_4^-$  concentration was measured by LSC at Time = 0 and then birnessite was added. Each sample contained 0.5 g/L birnessite and was buffered to pH 6.5 by 10 mM NaPIPES, or 8.0 by 10 mM NaHCO<sub>3</sub>. The sorption of  $\text{TcO}_4^-$  on birnessite was determined to be  $0.00 \pm 0.00\%$ ,  $1.27 \pm 1.85\%$ , and  $0.02 \pm 0.01\%$  for samples buffered by NaPIPES, NaHEPES and NaHCO<sub>3</sub> respectively and thus was considered negligible.
